# Supplementary material
Source: PubMed Central journal article supplement (PMC4349073)
Supplement: 1d3340776ef794cb55f1ba2ff1934c54_genetics.114.171702-2.pdf [file 1d3340776ef794cb55f1ba2ff1934c54_genetics.114.171702-2.pdf]

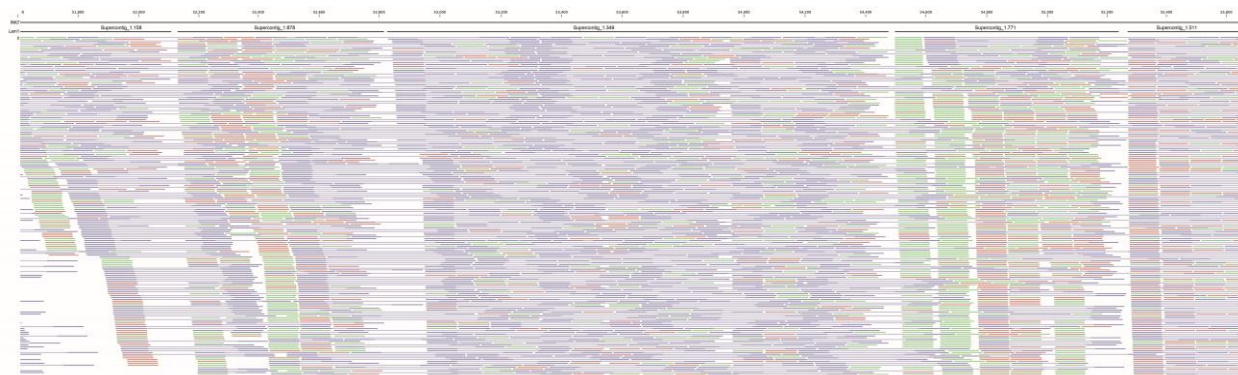

**Figure S2** A fragment of paired-end read mapping to the matA1 scaffold illustrating ‘stepping’ across the gaps approach and supporting linkage of the supercontigs into the longer scaffold. The black line at the top shows the resulting matA1 scaffold; horizontal black lines immediately under it show the location of individual supercontigs joined together. Thick coloured lines show individual reads; paired reads (blue) connected by a thin blue line, indicate pairing. Many such paired reads map on both sides of the gaps between the supercontigs, providing support for joining them into a longer scaffold.
