# Supplementary material
Source: PubMed Central journal article supplement (PMC4349073)
Supplement: 888adbd53a1d30cc071f47c69fc70e07_genetics.114.171702-5.pdf [file 888adbd53a1d30cc071f47c69fc70e07_genetics.114.171702-5.pdf]

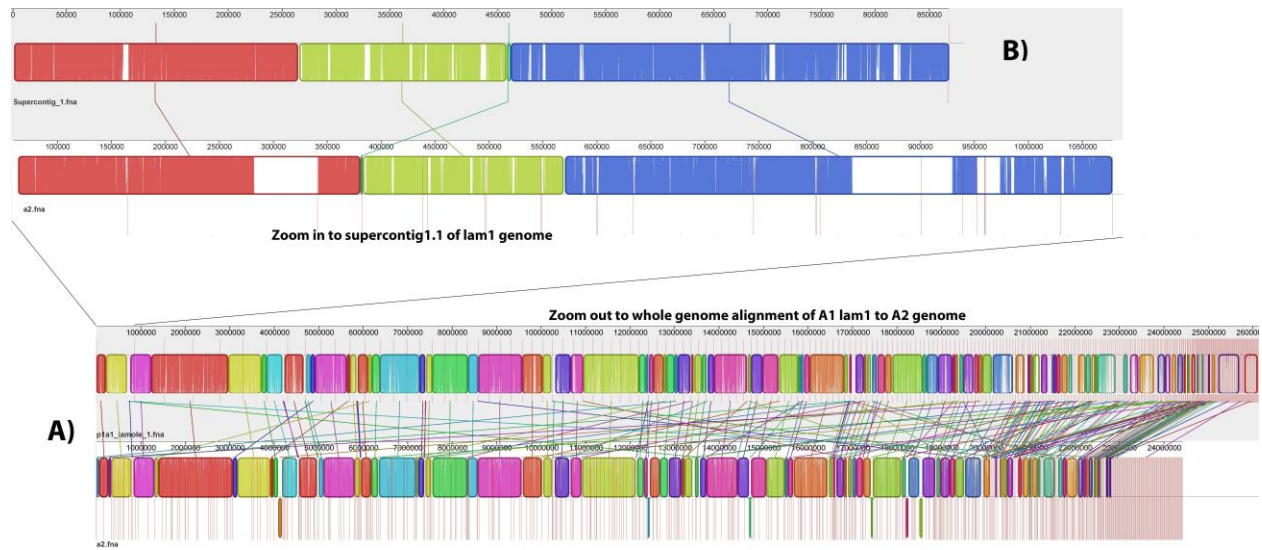

**Figure S3** Alignment of A1 lam1 and *de novo* assembled A2 genomes. As in Figure 2, the blocks show regions of homology and the coloured bars in the blocks indicate the extent of local sequence similarity (see Figure 2 legend for details). The alignment of A1 and A2 genomes is shown in panel A, while panel B represents an alignment supercontig1\_1 of the lam1 genome with homologous regions in the A2 genome.
